# Supplementary material for: Serum N-glycan profiles differ for various breast cancer subtypes
Source: PubMed Central journal article supplement (PMC8116229; doi:10.1007/s10719-021-10001-3), 2021-04-20

Scores plot

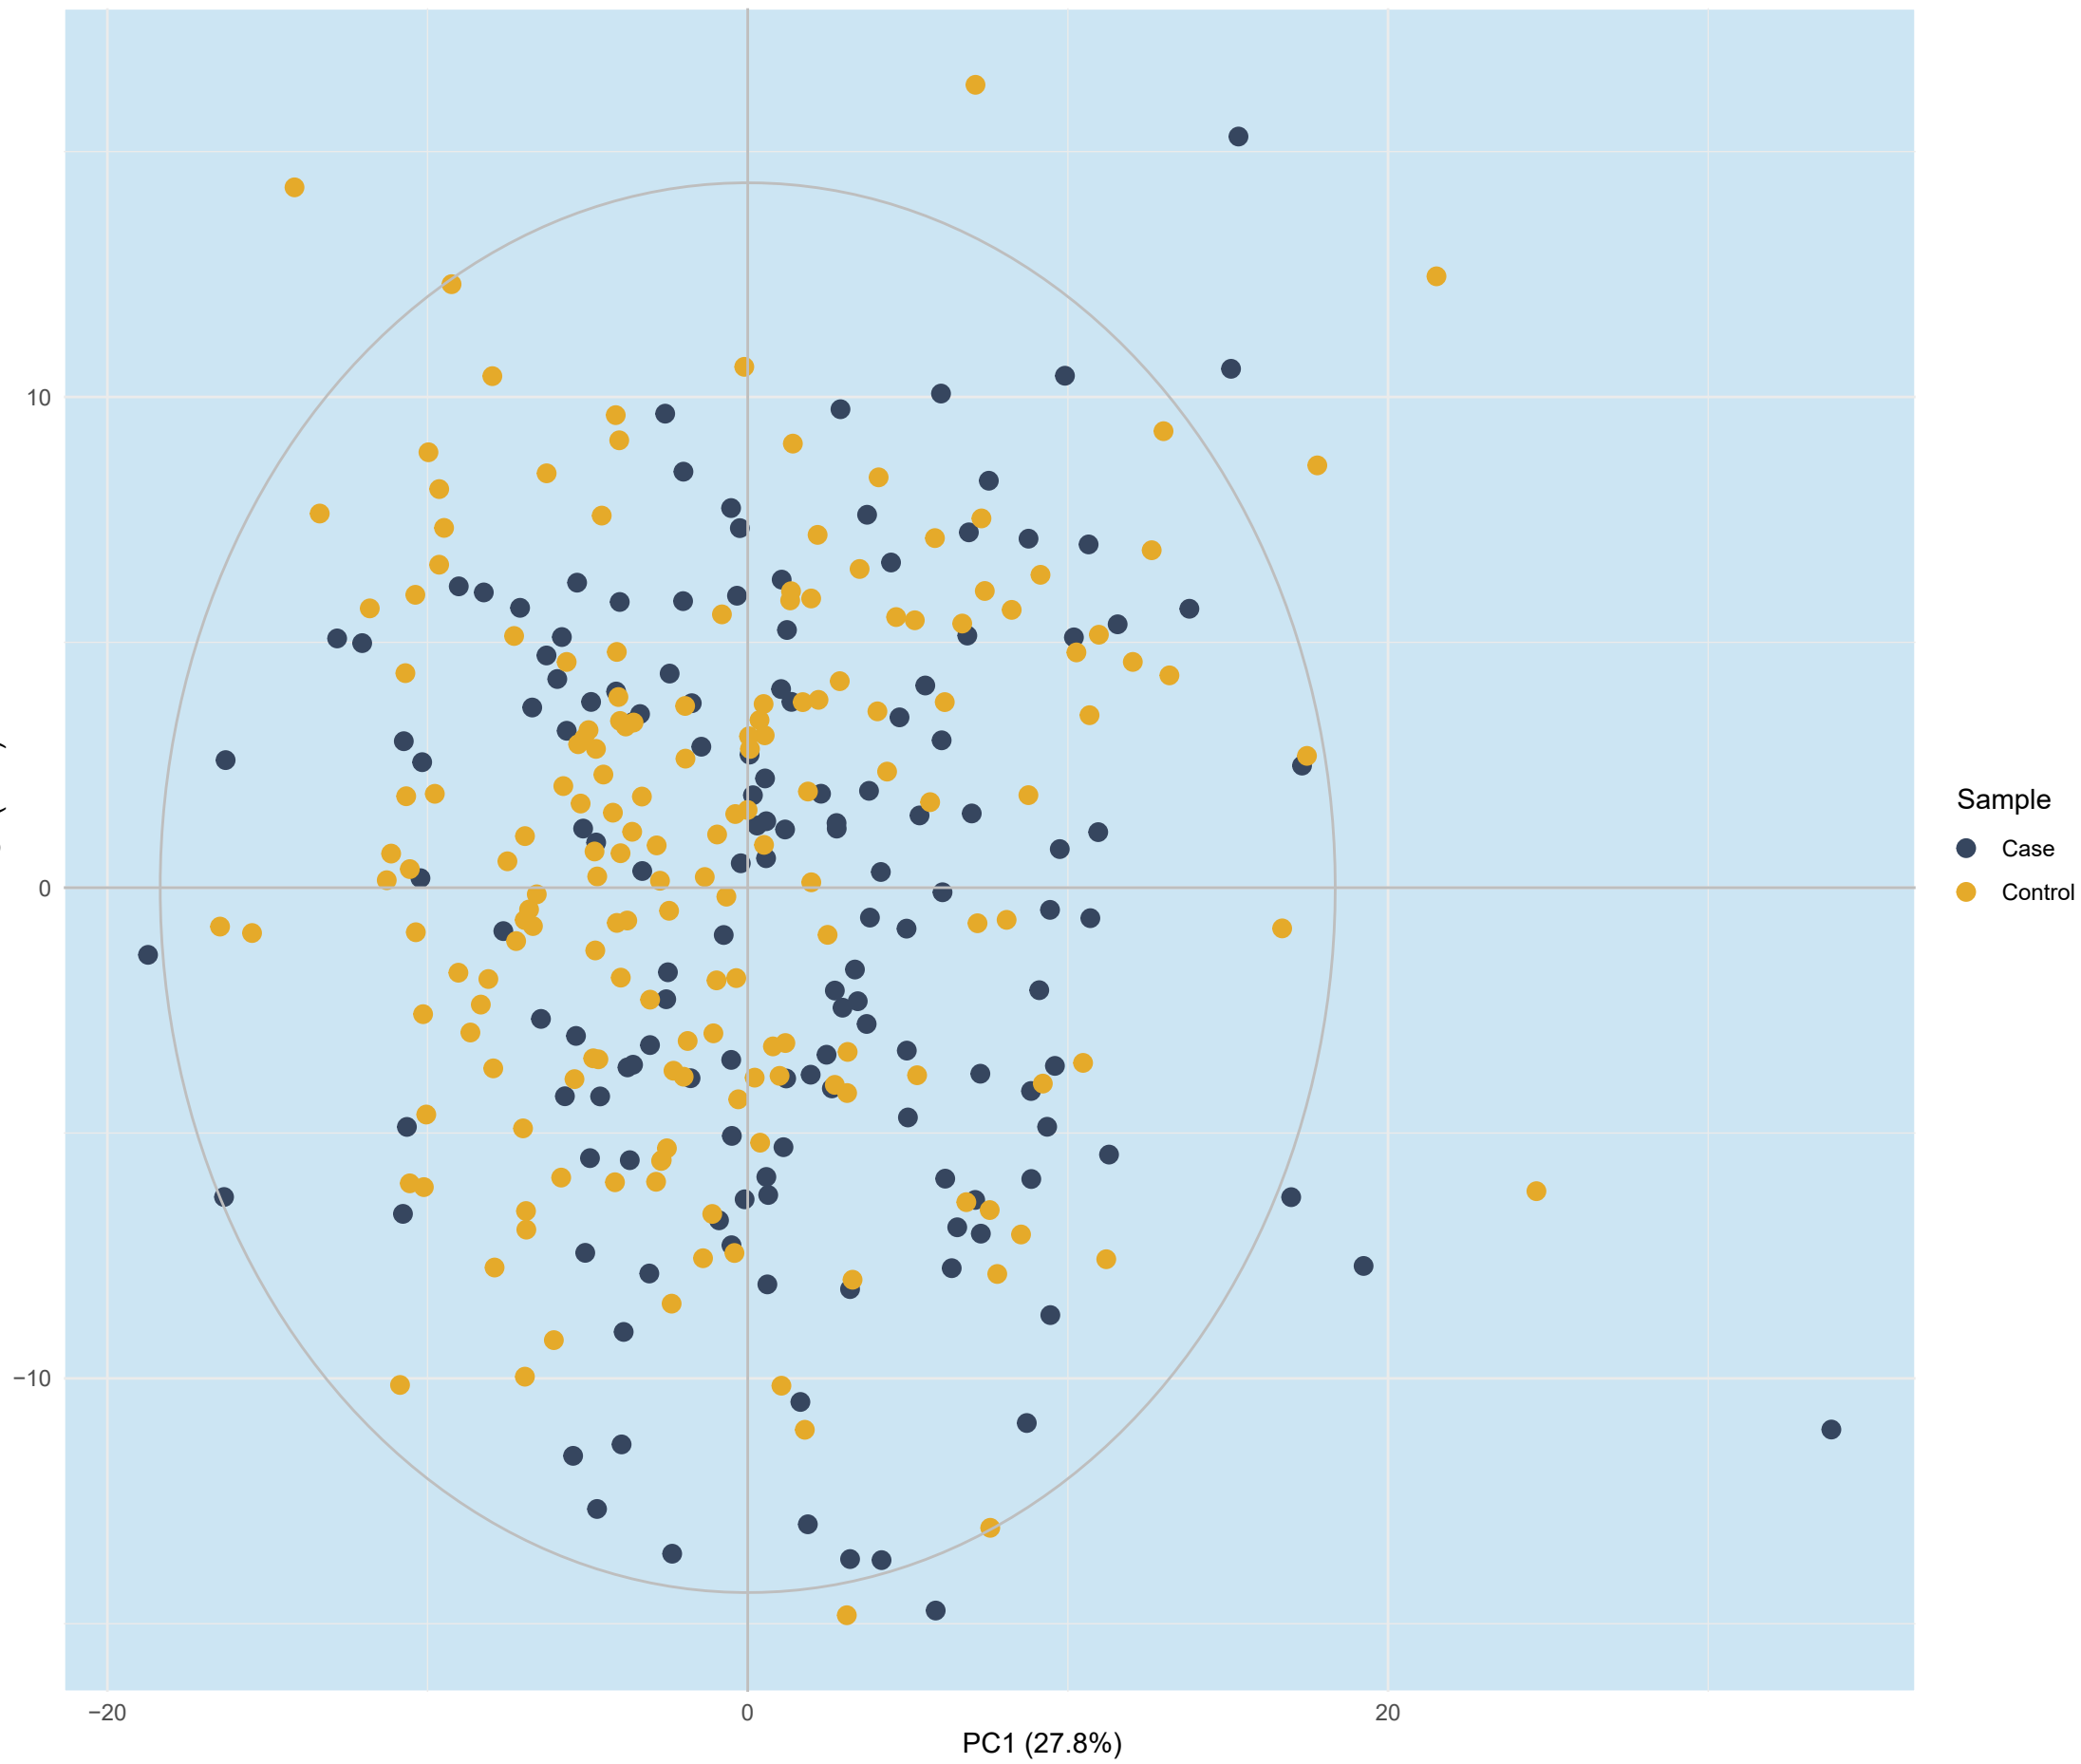

Scores plot

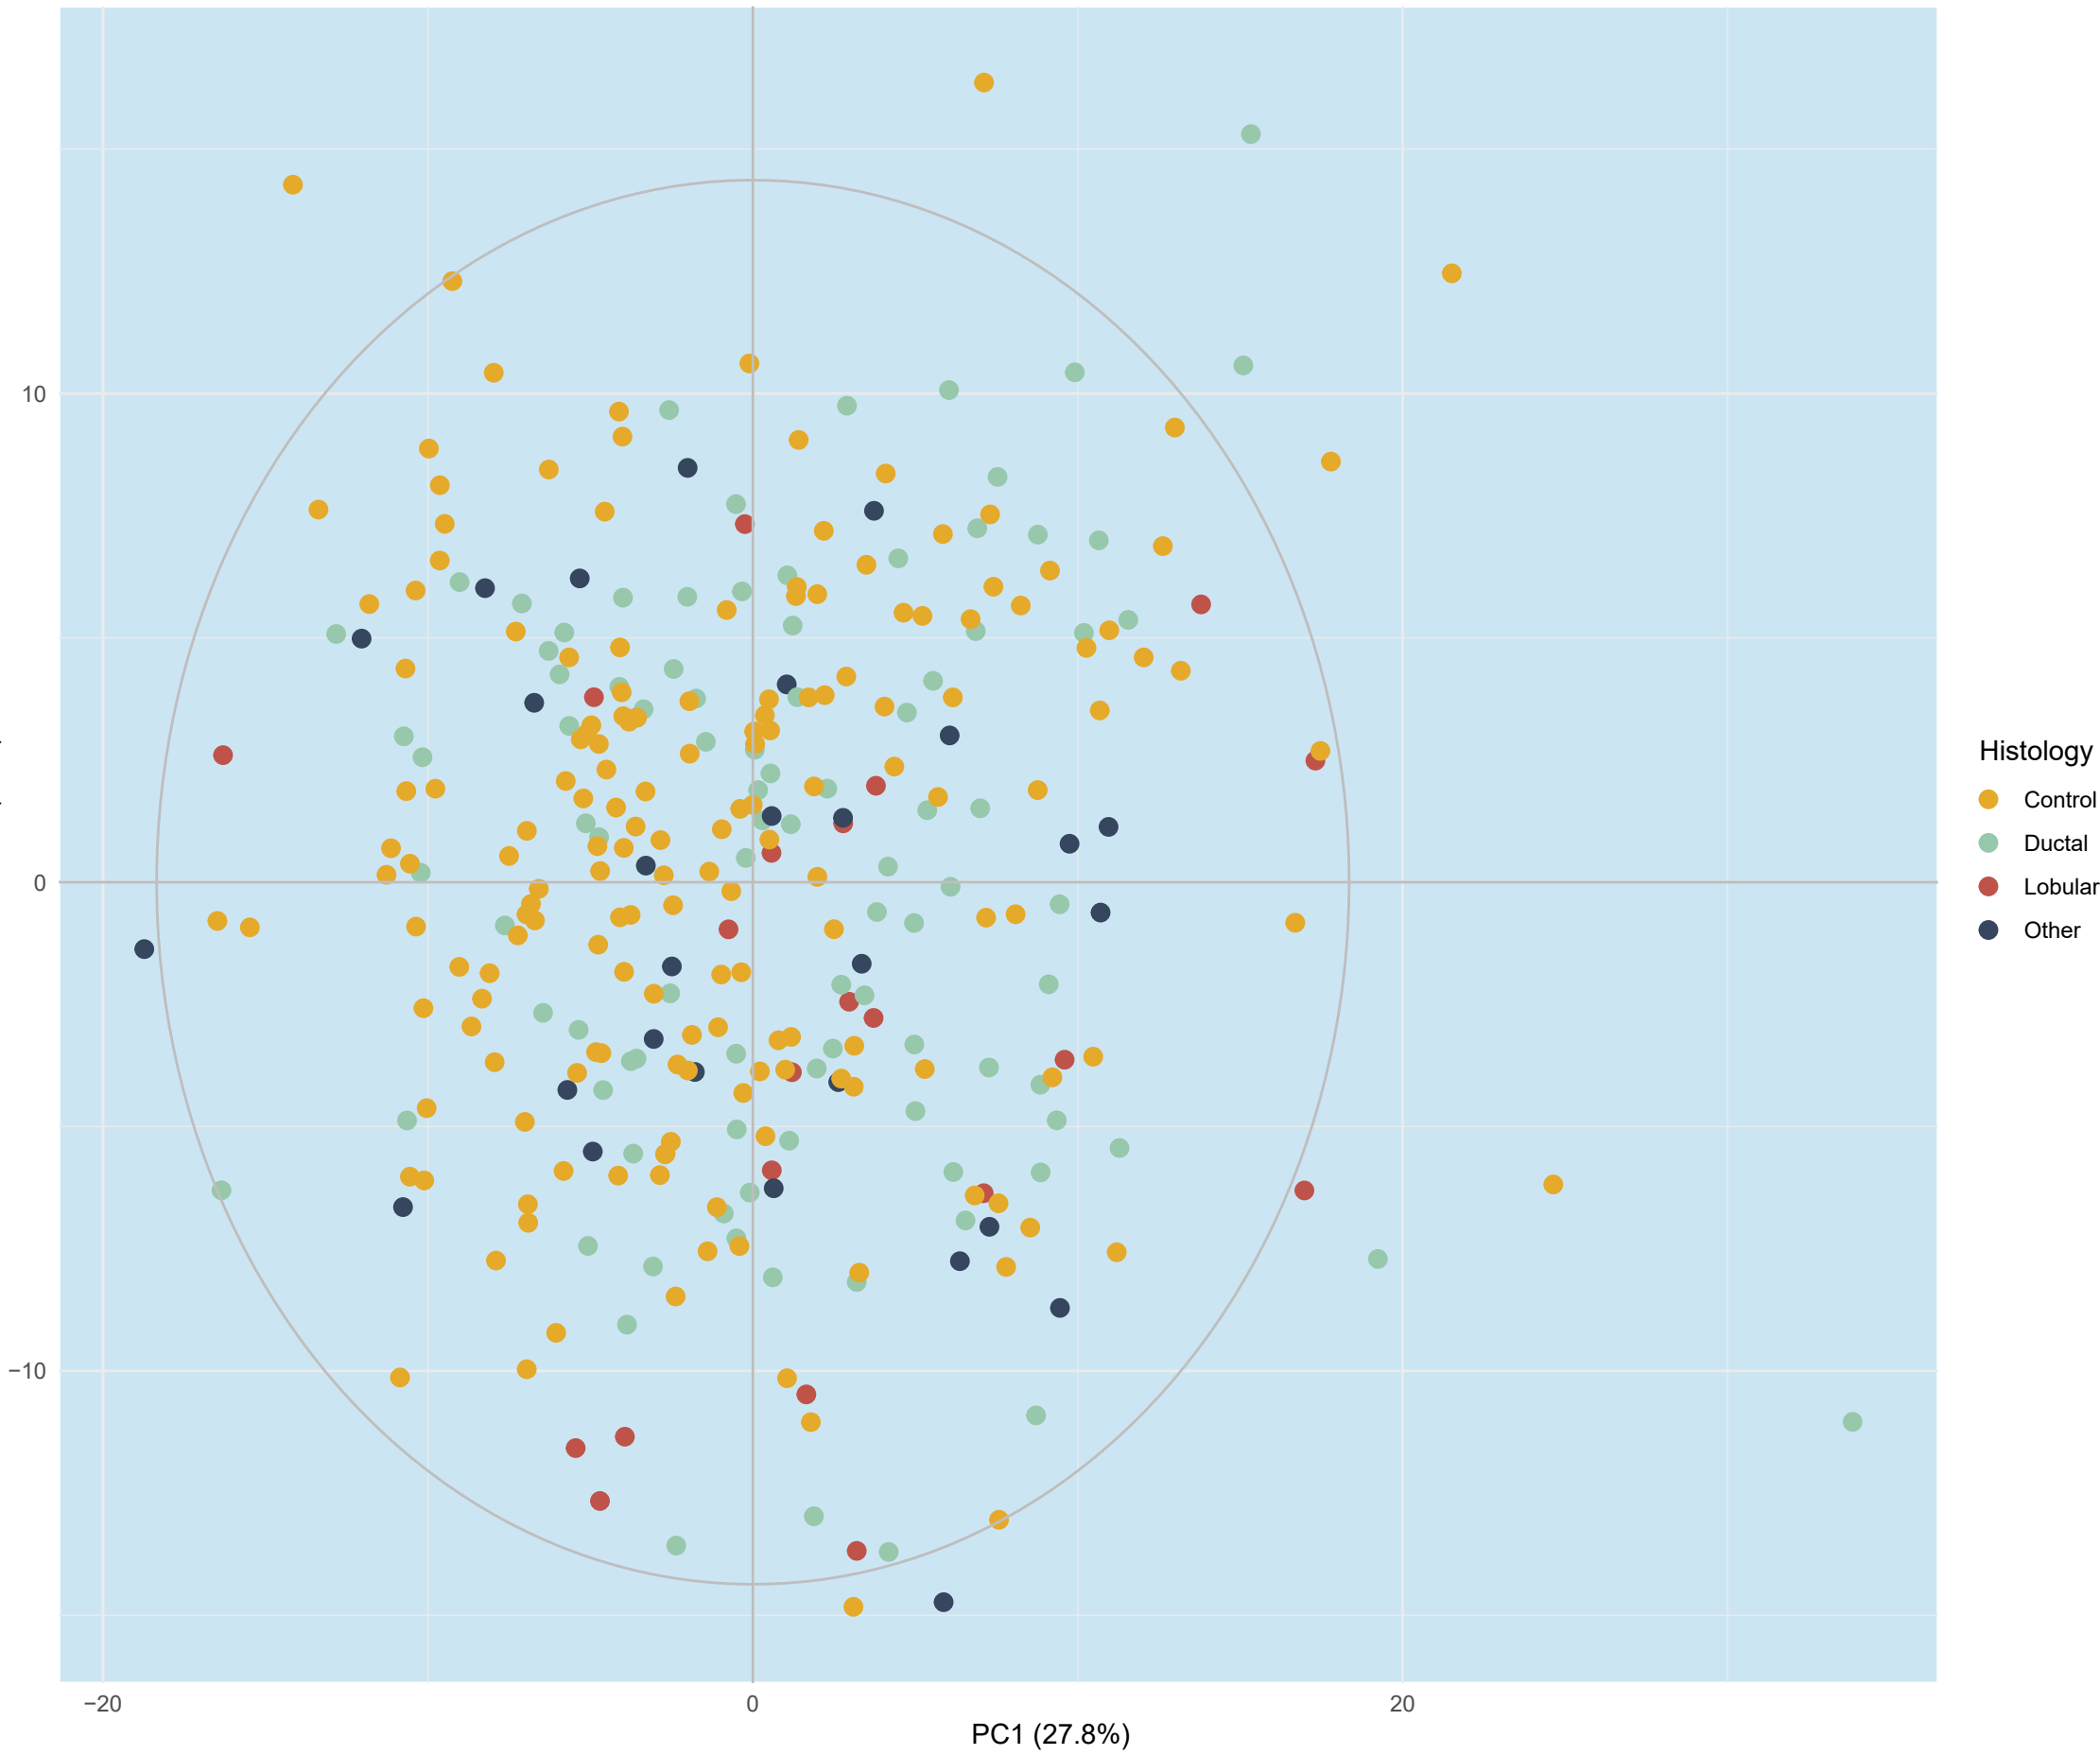

Scores plot

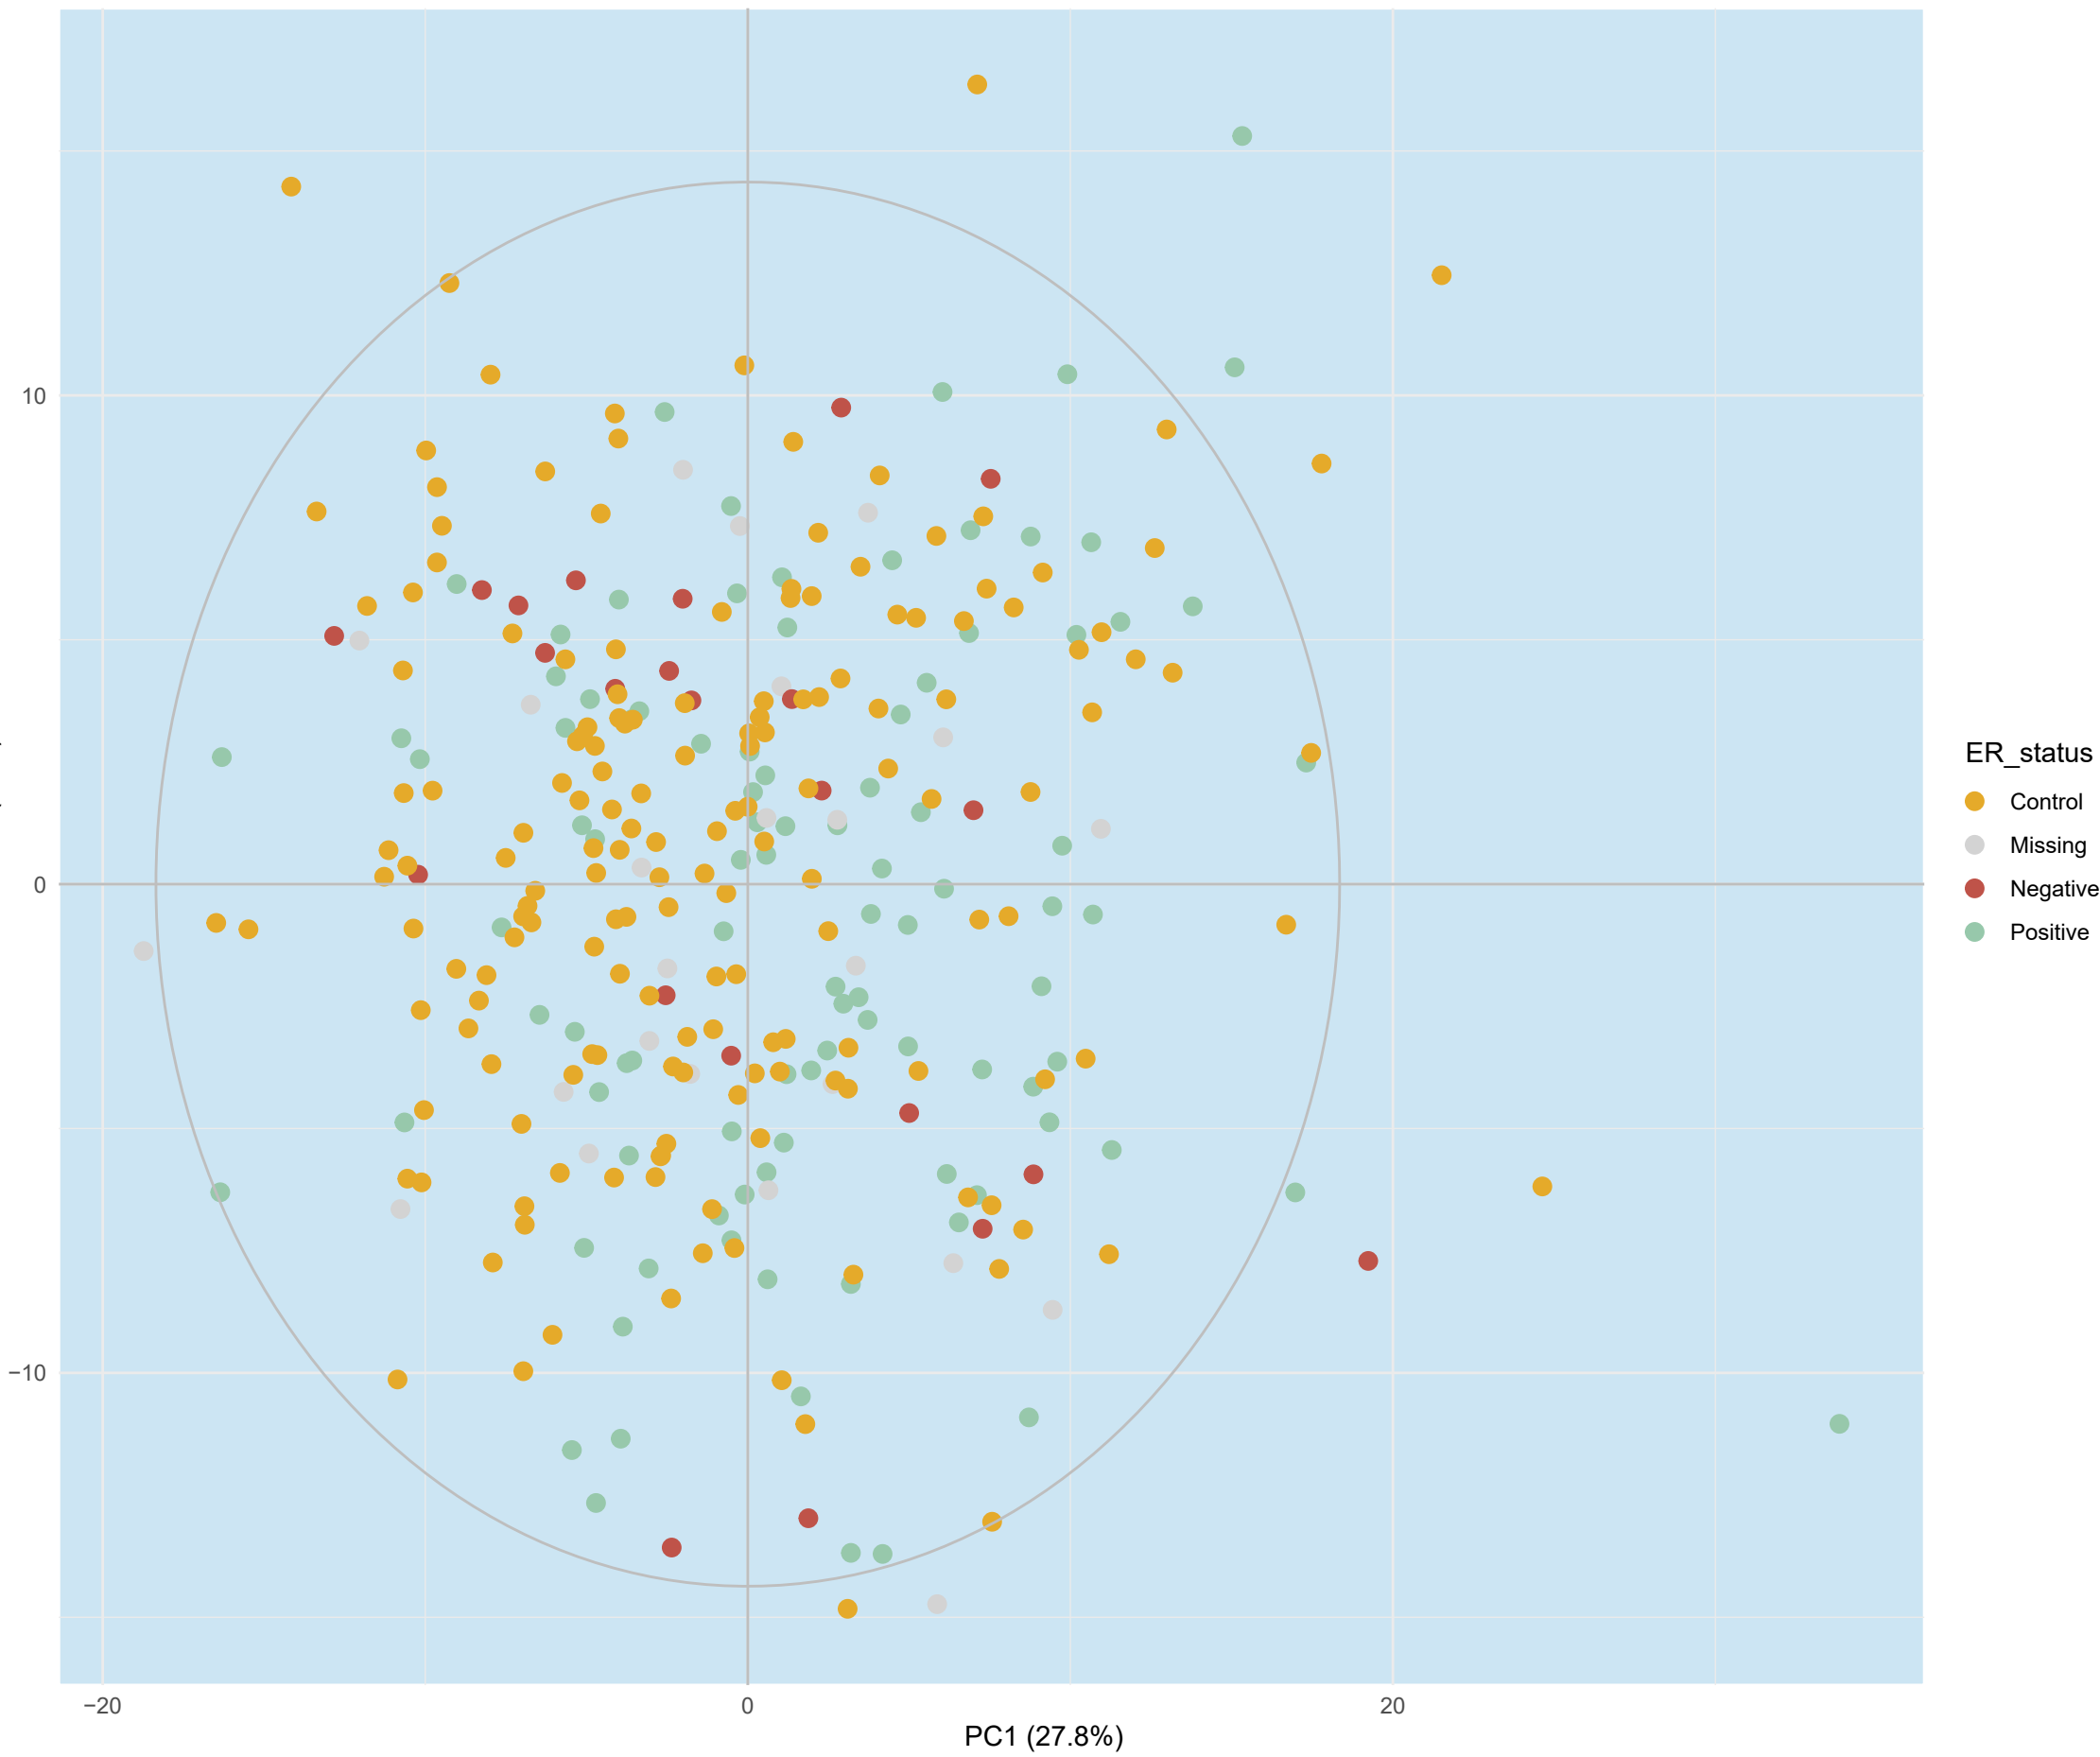

Scores plot

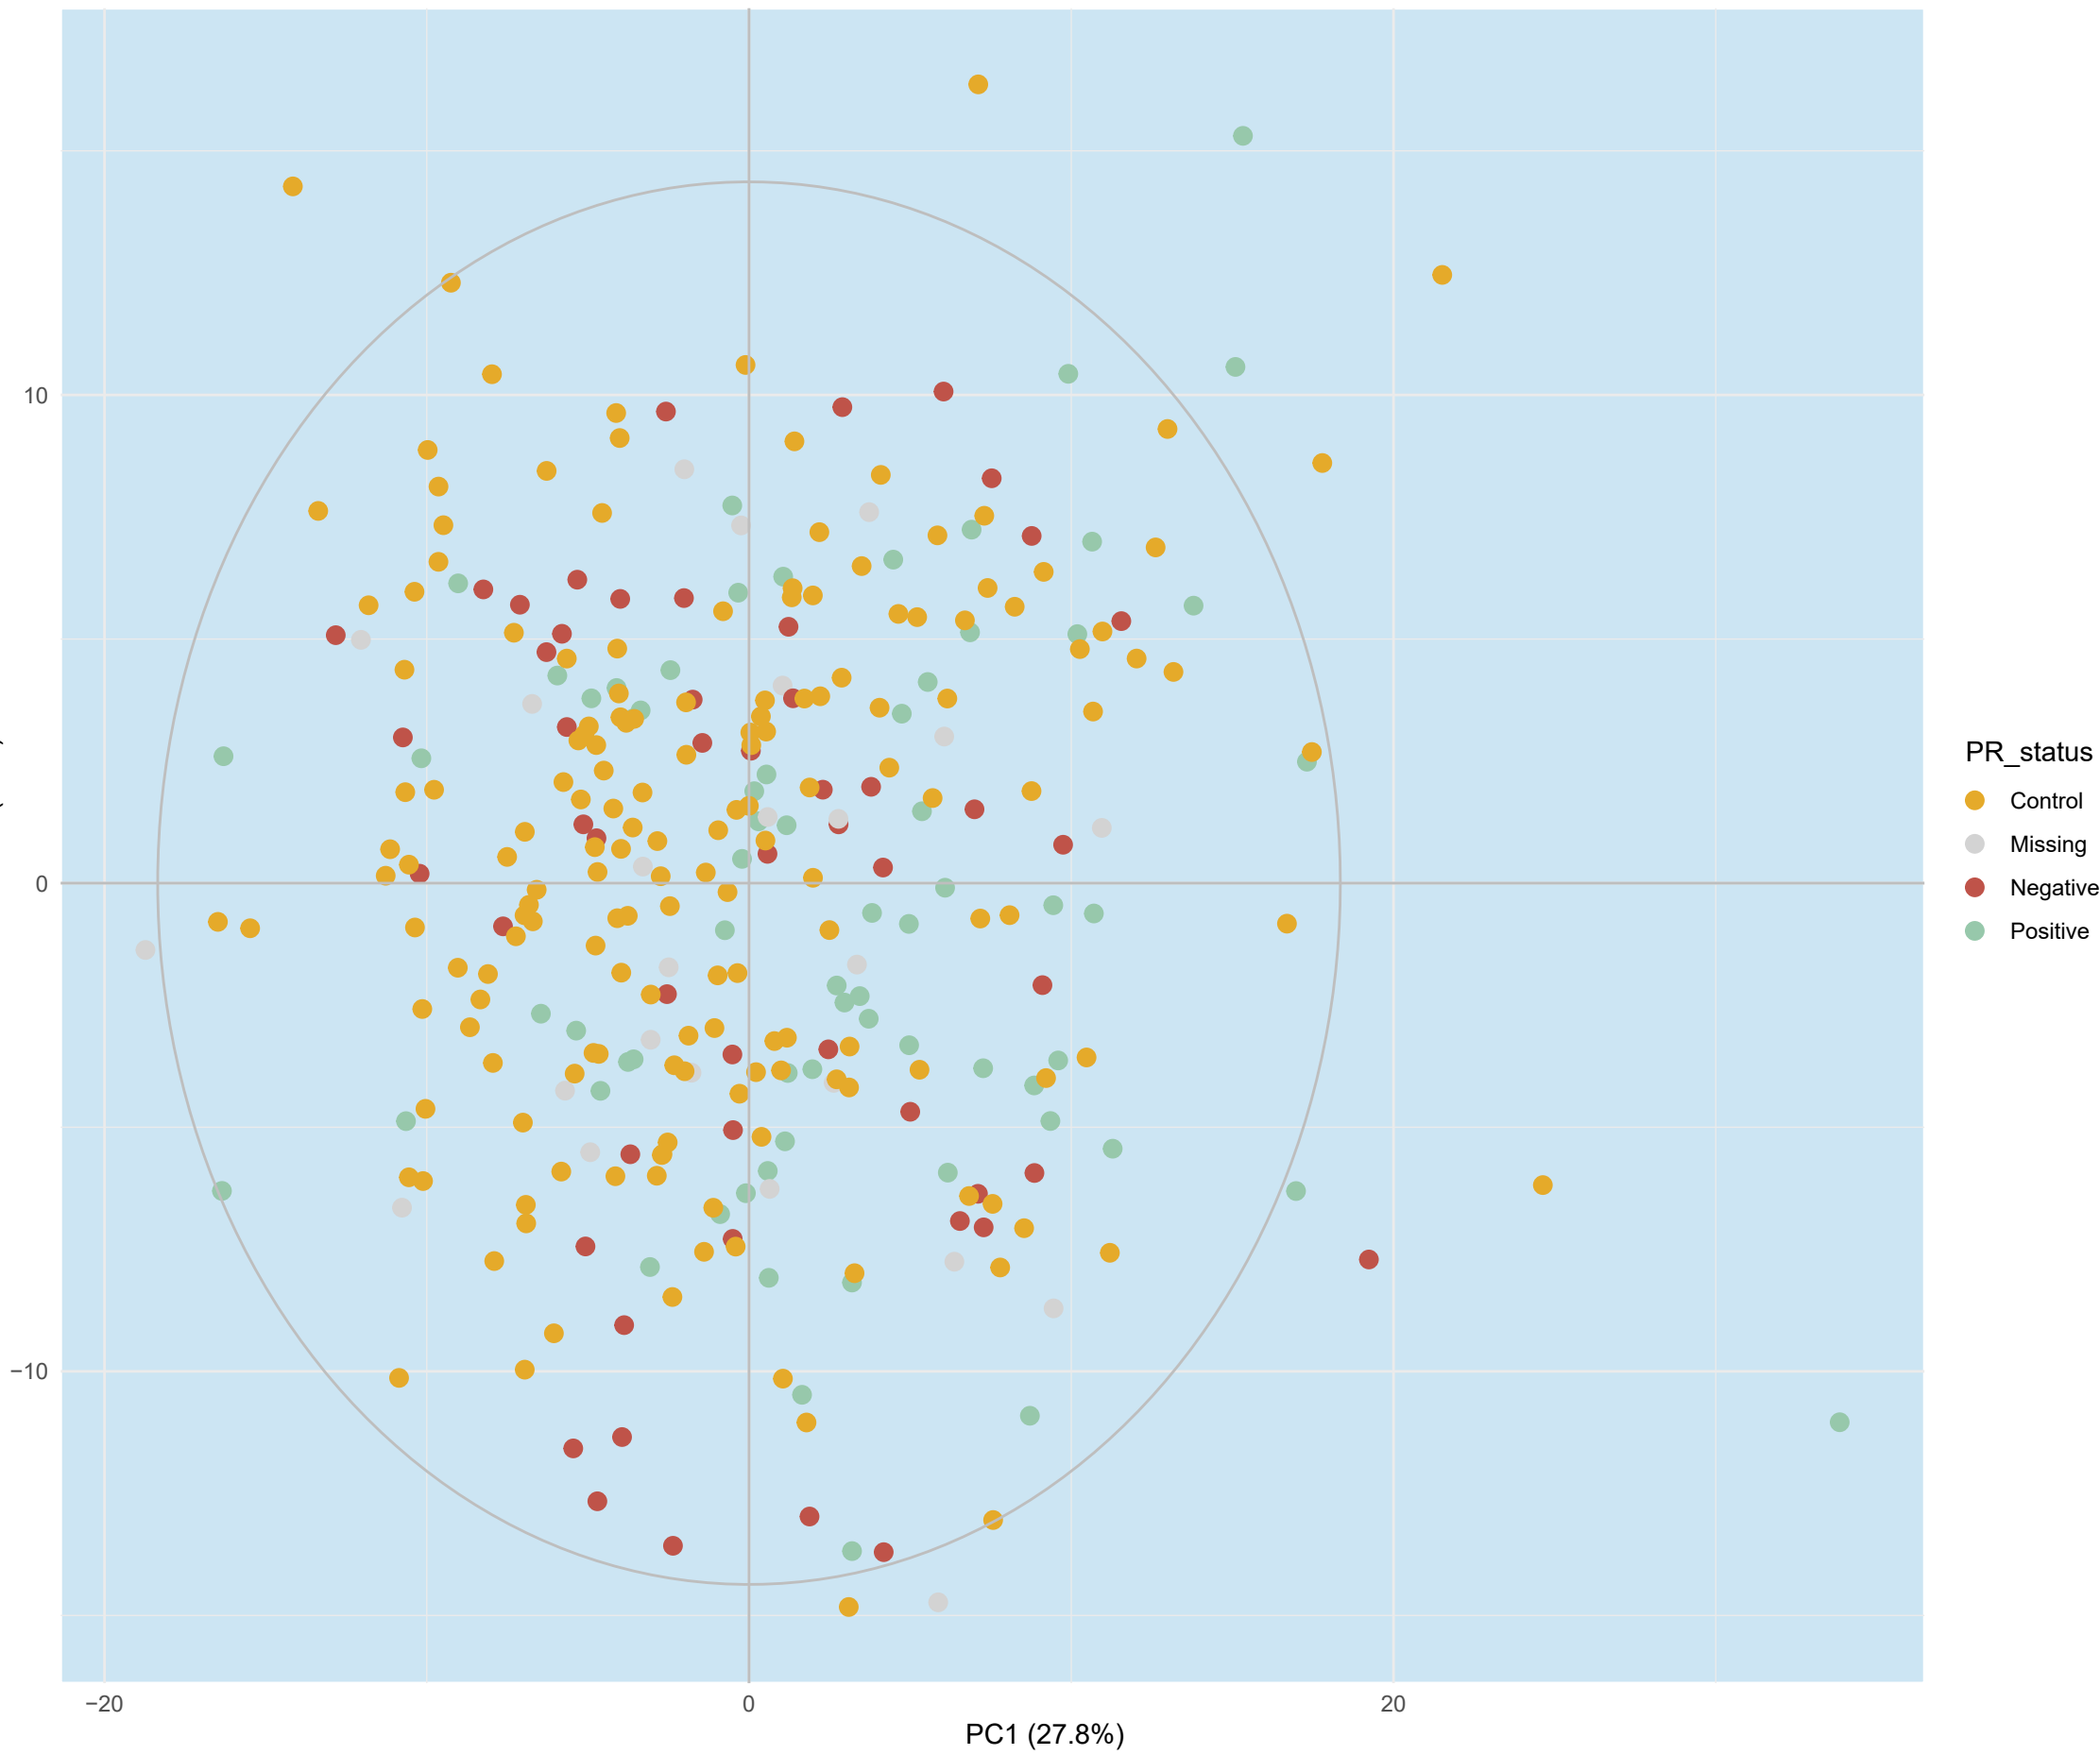

Scores plot

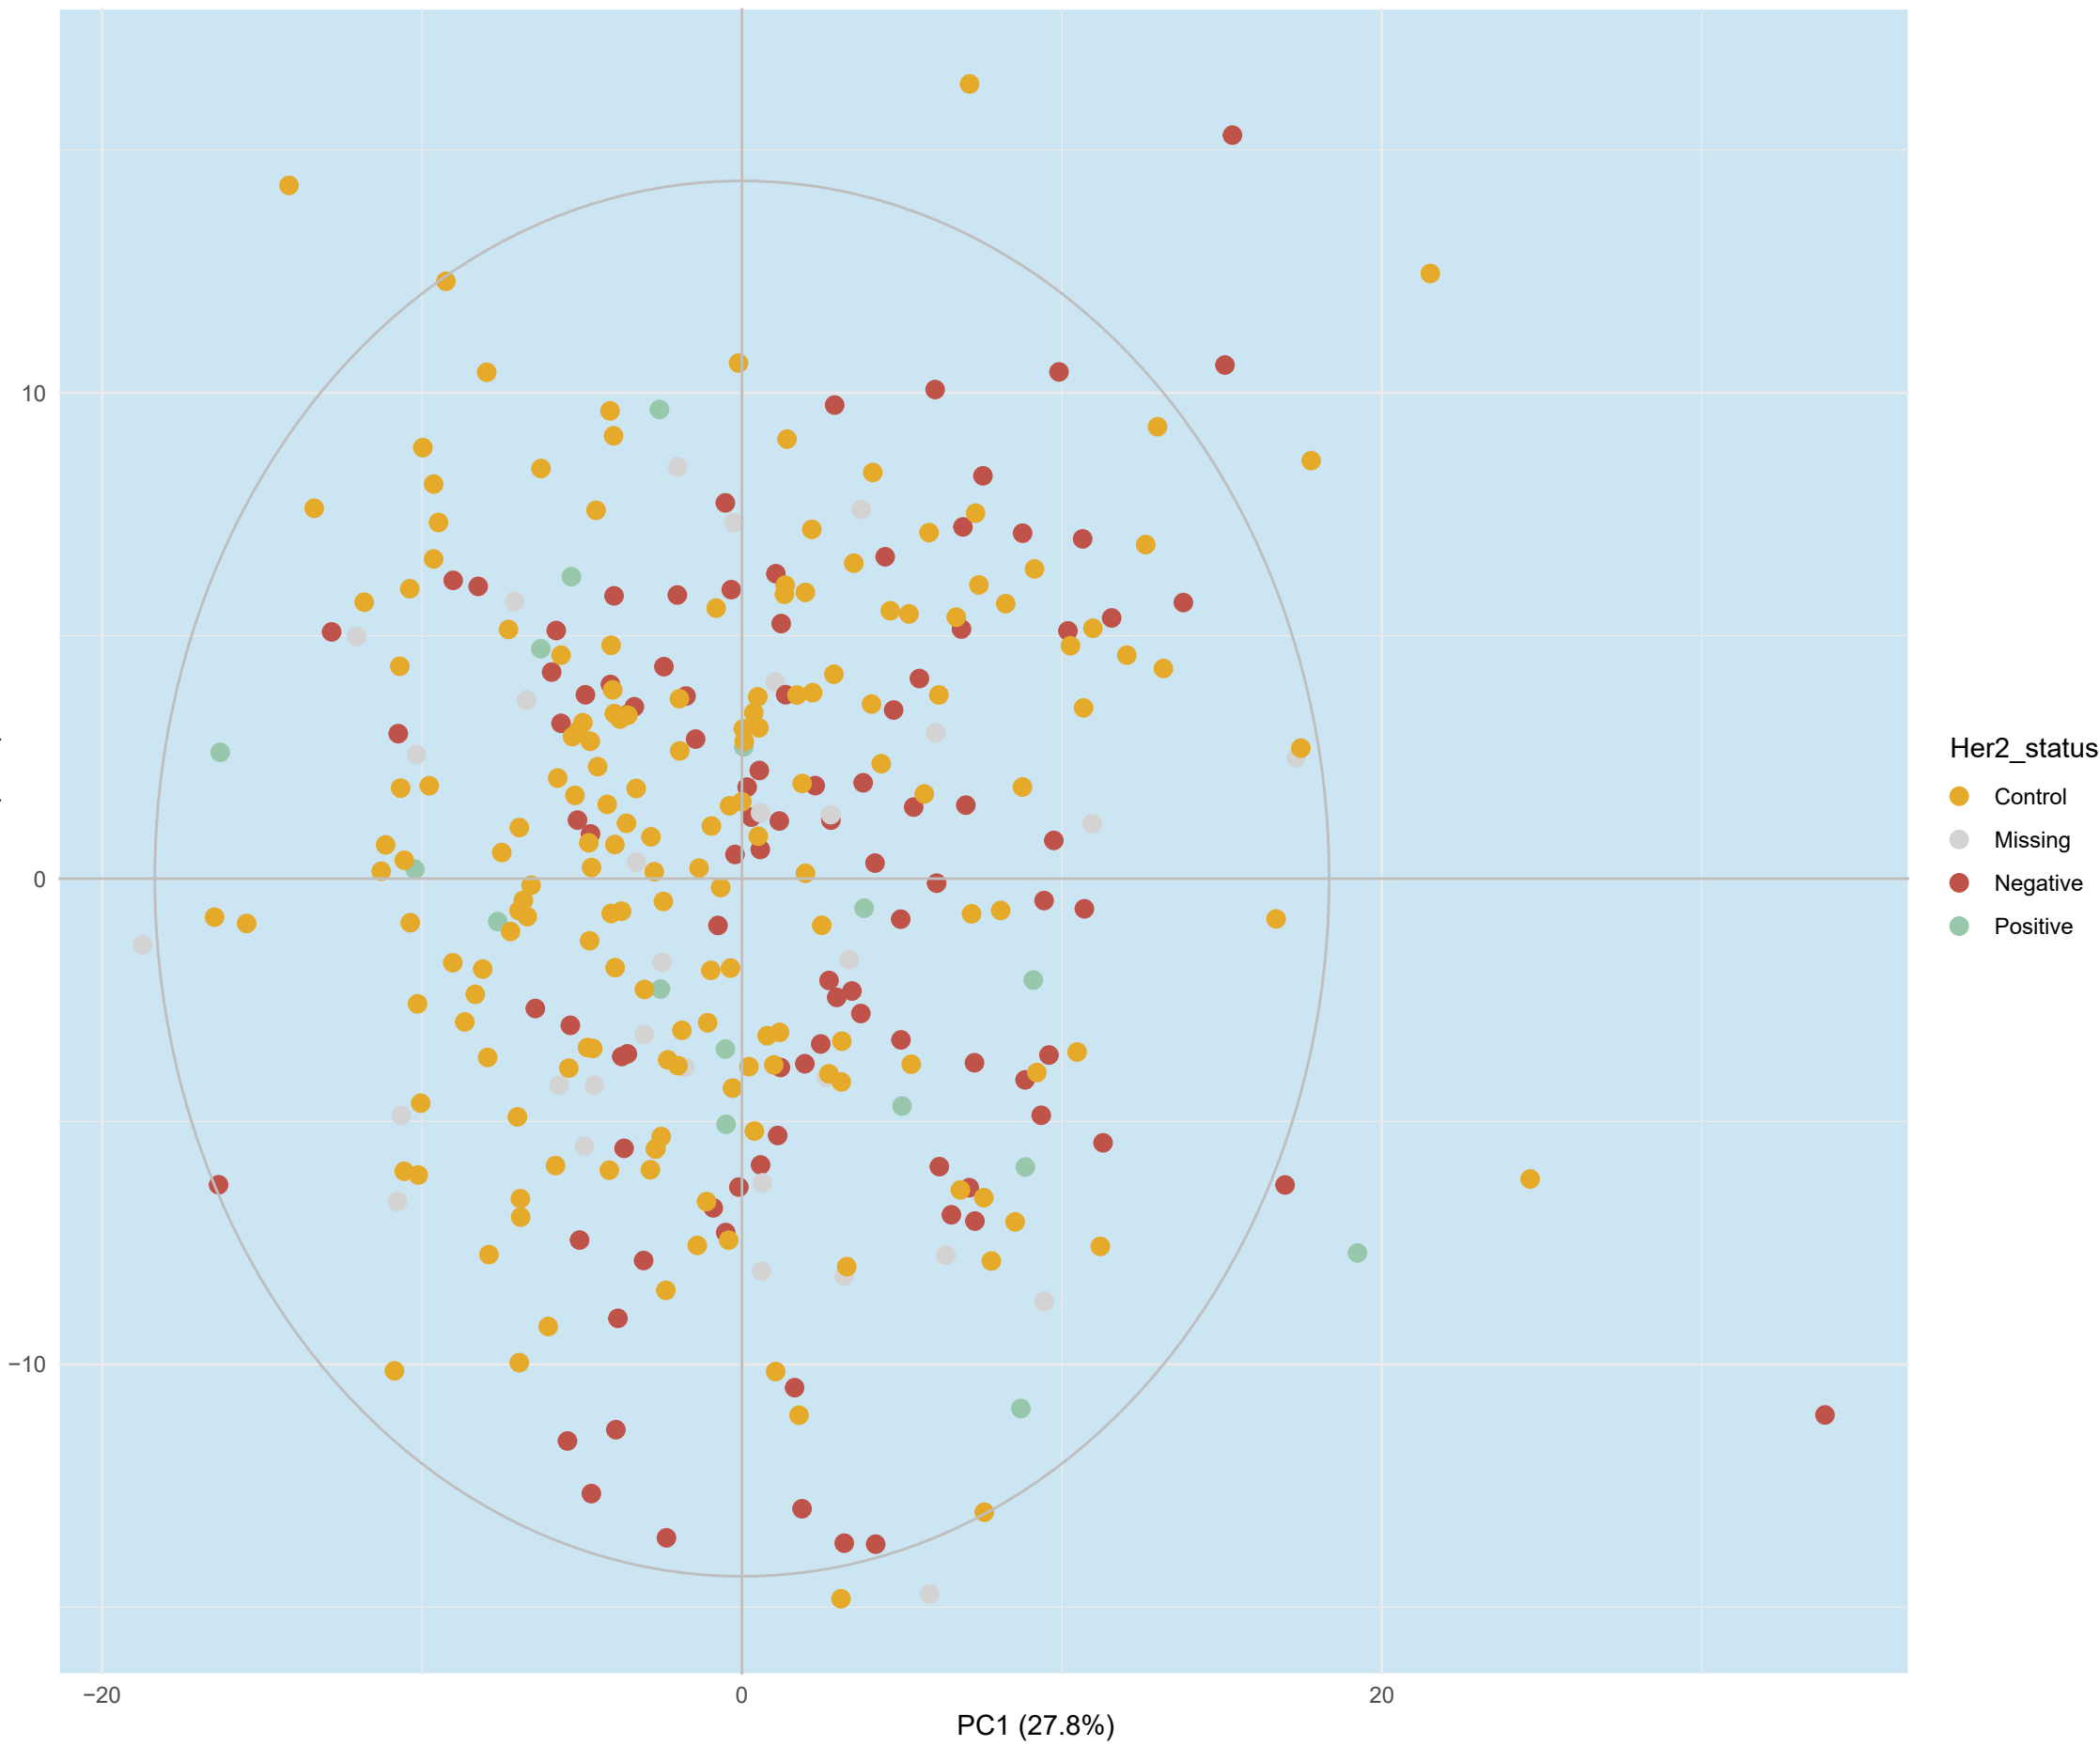

Scores plot

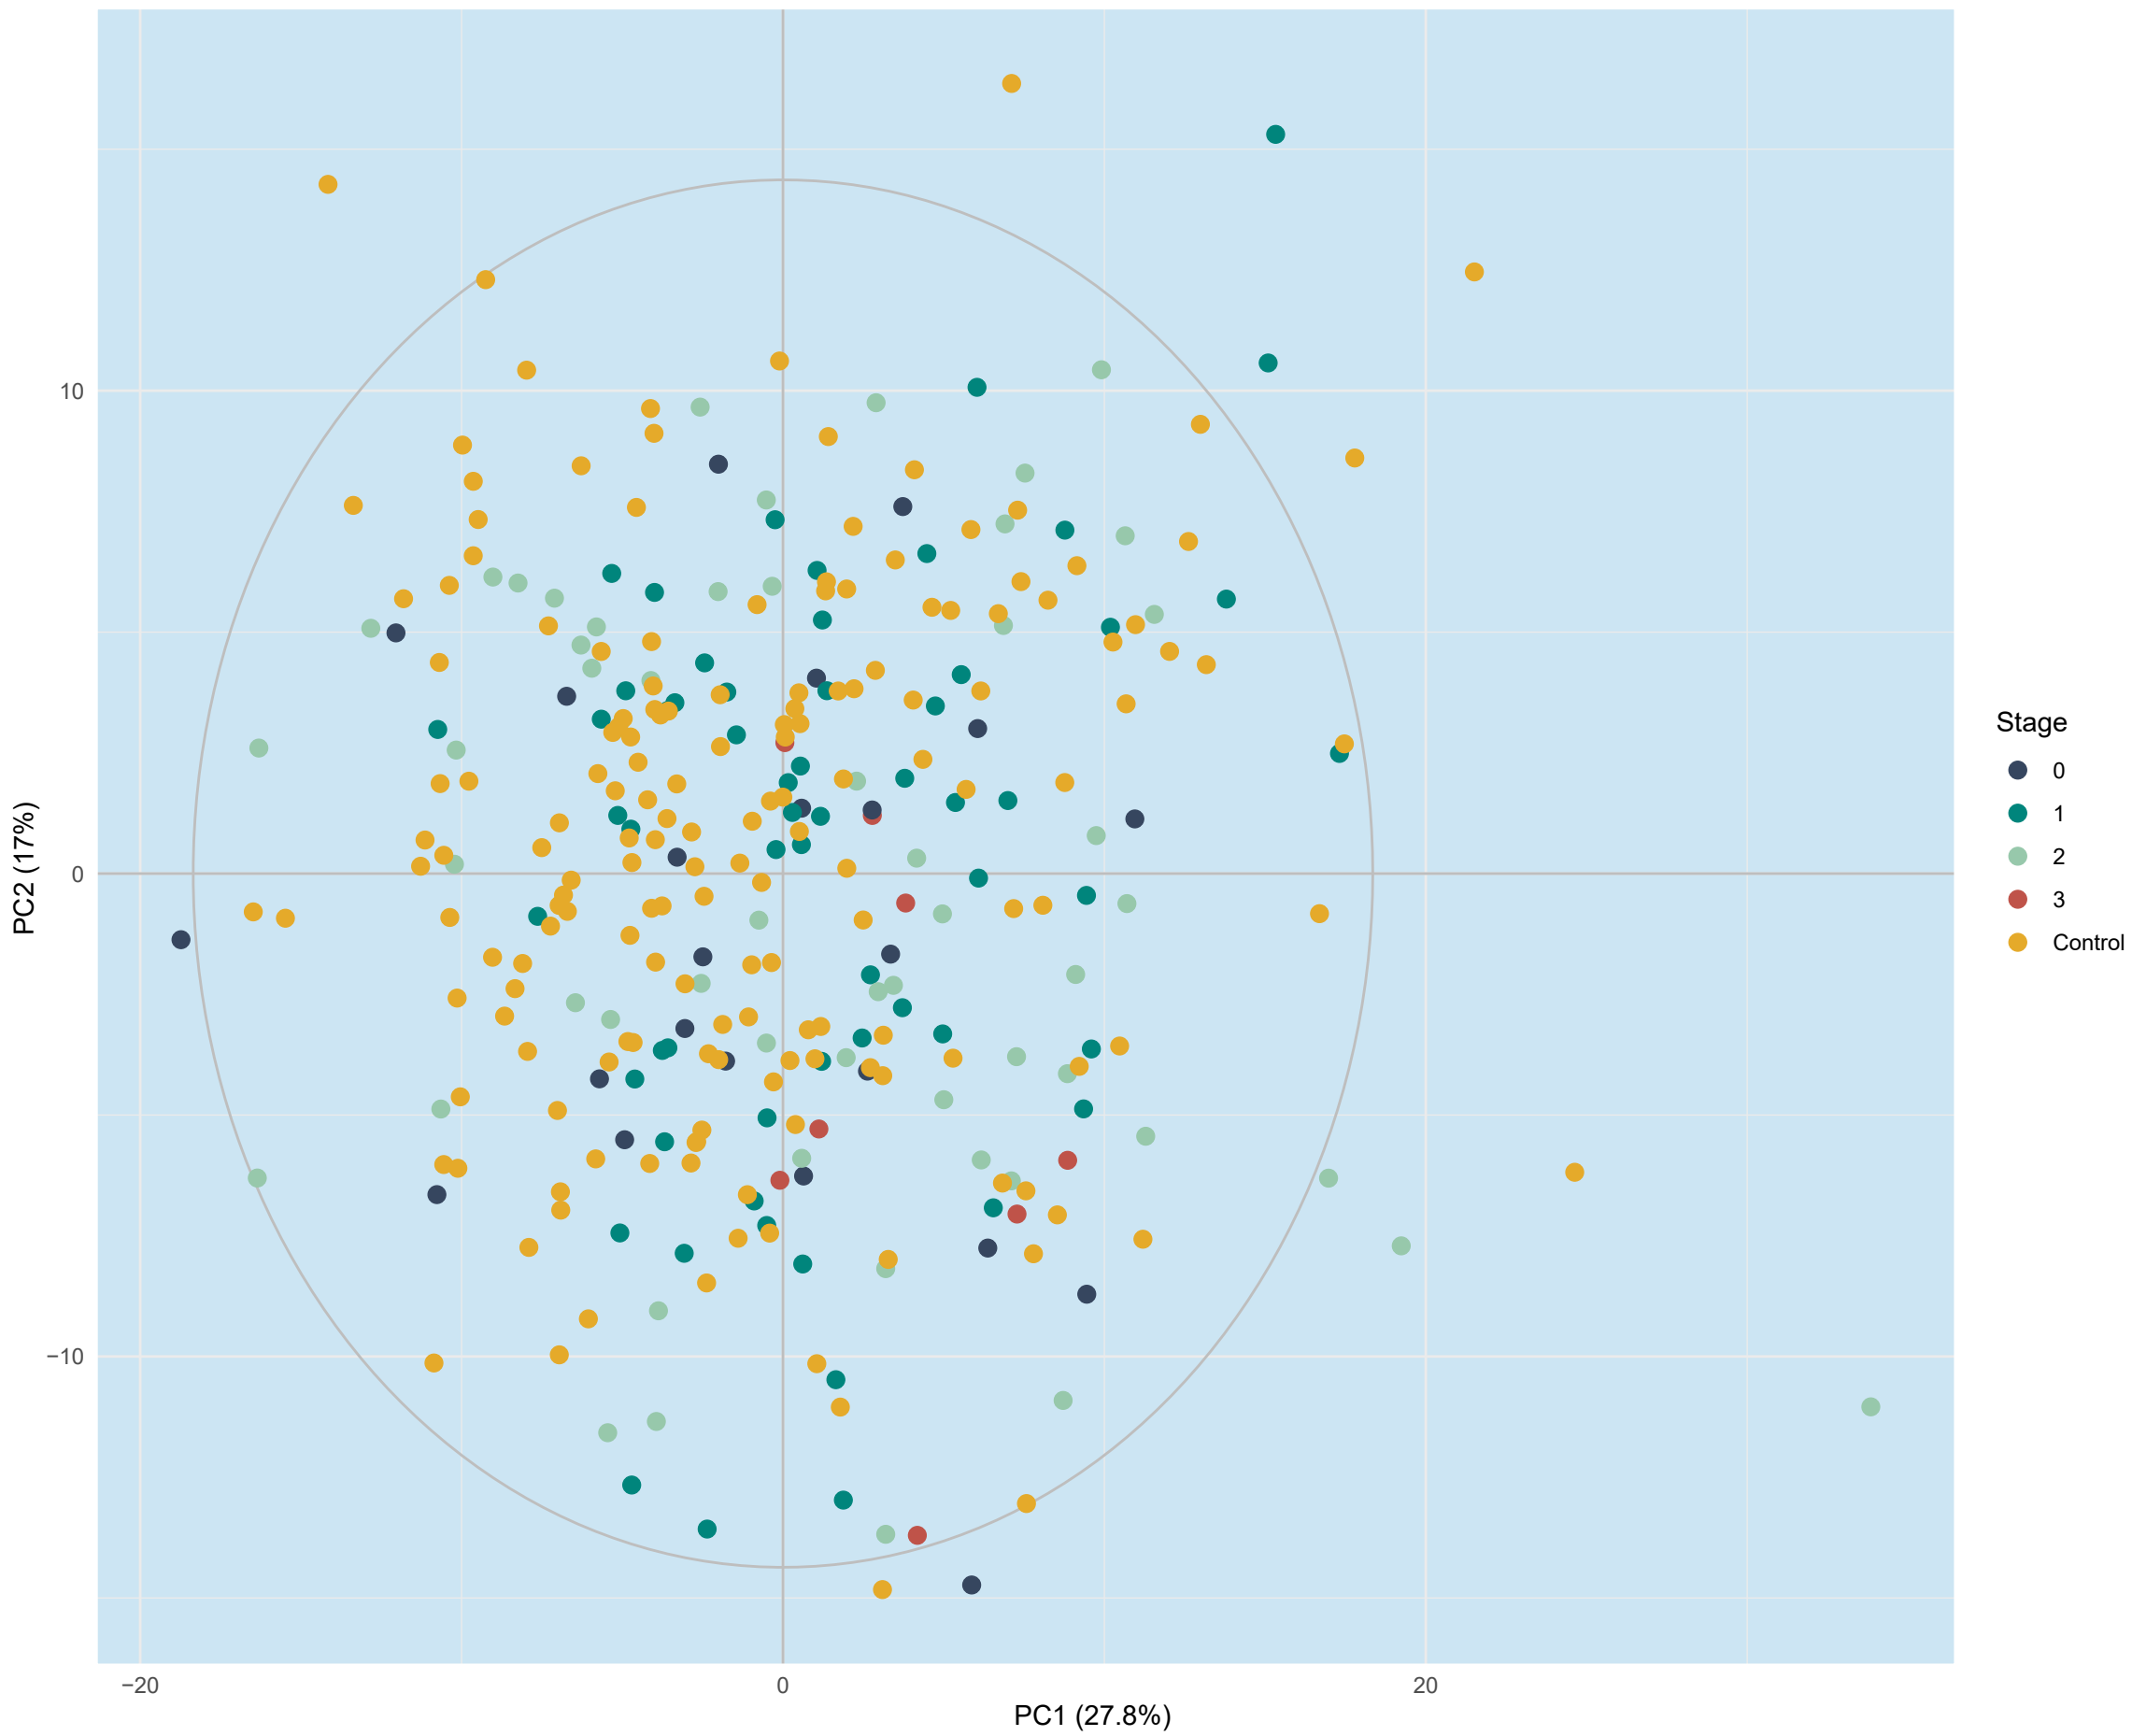

Supplement: 10719_2021_10001_MOESM3_ESM.pdf [file 10719_2021_10001_MOESM3_ESM.pdf]
