# Supplementary material for: Serum N-glycan profiles differ for various breast cancer subtypes
Source: Glycoconj J. 2021 Apr 20;38(3):387–95. doi: 10.1007/s10719-021-10001-3 (PMC8116229; doi:10.1007/s10719-021-10001-3)

- Case vs Control
- Histology
- Positive ER-status vs. Control
- Positive PR-status vs. Control
- Negative Her2-status vs. Control
- Stage 3 vs. Control

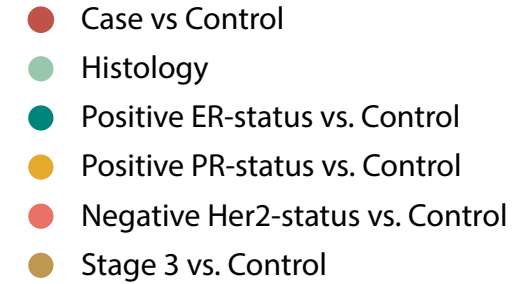

Supplement: Supplementary file 2 — (PDF 213 KB) [file 10719_2021_10001_MOESM2_ESM.pdf]
